# Supplementary material
Source: PubMed Central journal article supplement (PMC7955571)
Supplement: mmc1.pdf [file mmc1.pdf]

## Supplementary material

### A SARS-CoV-2 –human metalloproteome interaction map

Christos T. Chasapis<sup>a,b,c\*</sup>, Athanasia K. Georgiopoulou<sup>d</sup>, Spyros P. Perlepes<sup>e</sup>, Geir Bjørklund<sup>f</sup> and Massimiliano Peana<sup>g</sup>

<sup>a</sup> NMR facility, Instrumental Analysis Laboratory, School of Natural Sciences, University of Patras, Patras, Greece

<sup>b</sup> Institute of Chemical Engineering Sciences, Foundation for Research and Technology, Hellas (FORTH/ICE-HT), Patras, Greece

<sup>c</sup> School of Agricultural Science, University of Patras, Mesolonghi, Greece

<sup>d</sup> Department of Biosystems, Science and Agricultural Engineering, University of Patras, Mesolonghi, Greece

<sup>e</sup> Department of Chemistry, University of Patras, Patras, Greece

<sup>f</sup> Council for Nutritional and Environmental Medicine (CONEM), Mo i Rana, Norway

<sup>g</sup> Department of Chemistry and Pharmacy, University of Sassari, Italy

\* Corresponding Author: cchasapis@upatras.gr

All metalloproteins

| A/A | UniProt ID | Gene names                      | Protein names                                                                                                                                                                                                                                                                                                                                    | Length |
|-----|------------|---------------------------------|--------------------------------------------------------------------------------------------------------------------------------------------------------------------------------------------------------------------------------------------------------------------------------------------------------------------------------------------------|--------|
| 1   | Q86VM9     | ZC3H18 NHH1                     | Zinc finger CCGH domain-containing protein 18 (Nuclear protein NHH1)                                                                                                                                                                                                                                                                             | 953    |
| 2   | O75439     | PMPFCB MPBP                     | Mitochondrial-processing peptidase subunit beta (EC 3.4.24.64) (Beta-MPP) (P-52)                                                                                                                                                                                                                                                                 | 489    |
| 3   | Q5JRX3     | PITRM1 KIAA1104 MP1 PREP        | Presequence protease, mitochondrial (hPreP) (EC 3.4.24.-) (Pitriysin metalloproteinase 1) (Metalloprotease 1) (hMP1)                                                                                                                                                                                                                             | 1037   |
| 4   | Q6PML9     | SLC30A9 C4orf1 HUEL             | Zinc transporter 9 (ZnT-9) (Human embryonic lung protein) (HuEL) (Solute carrier family 30 member 9)                                                                                                                                                                                                                                             | 568    |
| 5   | Q8NEW0     | SLC30A7 ZNT7 ZNTL2              | Zinc transporter 7 (ZnT-7) (Solute carrier family 30 member 7) (ZnT-like transporter 2)                                                                                                                                                                                                                                                          | 376    |
| 6   | Q9JULX6    | AKAPBL NAKAP NAKAP95 HRIHFB2018 | A-kinase anchor protein 8-like (AKAP8-like protein) (Helicase A-binding protein 95) (HAP95) (Homologous to AKAP95 protein) (HA95) (Neighbor of A-kinase-anchoring protein 95) (Neighbor of AKAP95)                                                                                                                                               | 646    |
| 7   | P67870     | CSNK2B CK2N G5A                 | Casein kinase II subunit beta (CK II beta) (Phosvitin) (Protein G5a)                                                                                                                                                                                                                                                                             | 215    |
| 8   | Q92900     | UPF1 KIAA0221 RENT1             | Regulator of nonsense transcripts 1 (EC 3.6.4.-) (ATP-dependent helicase RENT1) (Nonsense mRNA reducing factor 1) (NORF1) (Up-frameshift suppressor 1 homolog) (hUpf1)                                                                                                                                                                           | 1129   |
| 9   | P09884     | POLA1 POLA                      | DNA polymerase alpha catalytic subunit (EC 2.7.7.7) (DNA polymerase alpha catalytic subunit p180)                                                                                                                                                                                                                                                | 1462   |
| 10  | P49642     | PRIM1                           | DNA primase small subunit (EC 2.7.7.-) (DNA primase 49 kDa subunit) (p49)                                                                                                                                                                                                                                                                        | 420    |
| 11  | P49643     | PRIM2 PRIM2A                    | DNA primase large subunit (DNA primase 58 kDa subunit) (p58)                                                                                                                                                                                                                                                                                     | 509    |
| 12  | O43823     | AKAP8 AKAP95                    | A-kinase anchor protein 8 (AKAP-8) (A-kinase anchor protein 95 kDa) (AKAP 95)                                                                                                                                                                                                                                                                    | 692    |
| 13  | O75592     | MYCBP2 KIAA0916 PAM             | E3 ubiquitin-protein ligase MYCBP2 (EC 2.3.2.33) (Myc-binding protein 2) (Protein associated with Myc)                                                                                                                                                                                                                                           | 4678   |
| 14  | Q95391     | SLU7                            | Pre-mRNA-splicing factor SLU7 (hSlu7)                                                                                                                                                                                                                                                                                                            | 586    |
| 15  | Q5VUA4     | ZNF318 HRIHFB2436               | Zinc finger protein 318 (Endocrine regulatory protein)                                                                                                                                                                                                                                                                                           | 2279   |
| 16  | Q8IWR0     | ZC3H7A ZC3H7 ZC3HDC7 HSPC055    | Zinc finger CCGH domain-containing protein 7A                                                                                                                                                                                                                                                                                                    | 971    |
| 17  | A7MCMY6    | TBKBP1 KIAA0775 SINTBAD         | TANK-binding kinase 1-binding protein 1 (TBK1-binding protein 1)                                                                                                                                                                                                                                                                                 | 615    |
| 18  | O14578     | CIT CRK KIAA0949 STK21          | Citron Rho-interacting kinase (CRIK) (EC 2.7.11.1) (Serine/threonine-protein kinase 21)                                                                                                                                                                                                                                                          | 2027   |
| 19  | Q92995     | USP13 ISOT3                     | Ubiquitin carboxyl-terminal hydrolase 13 (EC 3.4.19.12) (Deubiquitinating enzyme 13) (Isopeptidase T-3) (ISOT-3) (Ubiquitin thioesterase 13) (Ubiquitin-specific-processing protease 13)                                                                                                                                                         | 863    |
| 20  | Q9BQ03     | GORASP1 GOLPH5 GRASP65          | Golgi reassembly-stacking protein 1 (Golgi peripheral membrane protein p65) (Golgi phosphoprotein 5) (GOLPH5) (Golgi reassembly-stacking protein of 65 kDa) (GRASP65)                                                                                                                                                                            | 440    |
| 21  | Q9BQ58     | FYCO1 ZFYVE7                    | FYVE and coiled-coil domain-containing protein 1 (Zinc finger FYVE domain-containing protein 7)                                                                                                                                                                                                                                                  | 1478   |
| 22  | Q9NXA8     | SIRT5 SIRT5L                    | NAD-dependent protein deacetylase sirtuin-5, mitochondrial (EC 2.3.1.-) (Regulatory protein SIR2 homolog 5) (SIR2-like protein 5)                                                                                                                                                                                                                | 310    |
| 23  | Q9JH4P4    | RNF41 FLRF NRD1 SB8103          | E3 ubiquitin-protein ligase NRD1 (EC 2.3.2.27) (RING finger protein 41) (RING-type E3 ubiquitin transferase NRD1)                                                                                                                                                                                                                                | 317    |
| 24  | P14735     | IDE                             | Insulin-degrading enzyme (EC 3.4.24.56) (Abeta-degrading protease) (Insulin protease) (Insulysin)                                                                                                                                                                                                                                                | 1019   |
| 25  | P62072     | TIMM10 TIM10                    | Mitochondrial import inner membrane translocase subunit Tim10                                                                                                                                                                                                                                                                                    | 90     |
| 26  | Q9Y516     | TIMM10B FXC1 TIM9B TIMM9B       | Mitochondrial import inner membrane translocase subunit Tim10 B (Fracture callus protein 1) (FxC1) (Mitochondrial import inner membrane translocase subunit Tim9 B) (TIMM10B) (Tim10b)                                                                                                                                                           | 103    |
| 27  | Q9Y517     | TIM9B TIM9B TIM9A TIMM9A        | Mitochondrial import inner membrane translocase subunit Tim9                                                                                                                                                                                                                                                                                     | 89     |
| 28  | Q9NXH9     | TRMT1                           | tRNA (guanine(26)-N(2))-dimethyltransferase (EC 2.1.1.216) (tRNA 2,2-dimethylguanosine-26 methyltransferase) (tRNA(guanine-26,N(2)-N(2)) methyltransferase) (tRNA(m(2,2)G26)dimethyltransferase)                                                                                                                                                 | 659    |
| 29  | Q9H7F0     | ATP13A3 AFUR51                  | Probable cation-transporting ATPase 13A3 (EC 7.2.2.-) (ATPase family homolog up-regulated in senescence cells 1)                                                                                                                                                                                                                                 | 1226   |
| 30  | O43169     | CYB5B CYB5M OMB5                | Cytochrome b5 type B (Cytochrome b5 outer mitochondrial membrane isoform)                                                                                                                                                                                                                                                                        | 150    |
| 31  | Q95573     | ACSL3 ACS3 FACL3 LACS3          | Long-chain-fatty-acid-CoA ligase 3 (EC 6.2.1.3) (Arachidonate-CoA ligase) (EC 6.2.1.15) (Long-chain acyl-CoA synthetase 3) (LACS 3)                                                                                                                                                                                                              | 720    |
| 32  | P21964     | COMT                            | Catechol O-methyltransferase (EC 2.1.1.6)                                                                                                                                                                                                                                                                                                        | 271    |
| 33  | P61586     | RHOA ARH12 ARHA RHO12           | Transforming protein RhoA (EC 3.6.5.2) (Rho cDNA clone 12) (h12)                                                                                                                                                                                                                                                                                 | 193    |
| 34  | O96028     | NSD2 KIAA1090 MMSET TRX5 WHSC1  | Histone-lysine N-methyltransferase NSD2 (EC 2.1.1.356) (Multiple myeloma SET domain-containing protein) (MMSET) (Nuclear SET domain-containing protein 2) (Protein trithorax-5) (Wolf-Hirschhorn syndrome candidate 1 protein)                                                                                                                   | 1365   |
| 35  | Q86Y76     | MIB1 DIP1 KIAA1323 ZZANK2       | E3 ubiquitin-protein ligase MIB1 (EC 2.3.2.27) (DAPK-interacting protein 1) (DIP-1) (Mind bomb homolog 1) (RING-type E3 ubiquitin transferase MIB1) (Zinc finger ZZ type with ankyrin repeat domain protein 2)                                                                                                                                   | 1006   |
| 36  | Q8TD19     | NEK9 KIAA1995 NEK8 NERCC        | Serine/threonine-protein kinase Nek9 (EC 2.7.11.1) (Necrcc1 kinase) (Never in mitosis A-related kinase 9) (NimA-related protein kinase 9) (NimA-related kinase 8) (Nek8)                                                                                                                                                                         | 979    |
| 37  | Q96F45     | ZNF503 NOLZ1                    | Zinc finger protein 503                                                                                                                                                                                                                                                                                                                          | 646    |
| 38  | Q9BU02     | THTPA                           | Thiamine-triphosphatase (ThTPase) (EC 3.6.1.28)                                                                                                                                                                                                                                                                                                  | 230    |
| 39  | Q9Y519     | TIMM8B DDP2 DDPL TIM8B          | Mitochondrial import inner membrane translocase subunit Tim8 B (DDP-like protein) (Deafness dystonia protein 2)                                                                                                                                                                                                                                  | 83     |
| 40  | P62877     | RBX1 RNF75 ROC1                 | E3 ubiquitin-protein ligase RBX1 (EC 2.3.2.27) (EC 2.3.2.32) (E3 ubiquitin-protein transferase RBX1) (Protein ZYP) (RING finger protein 75) (RING-box protein 1) (Rbx1) (Regulator of cullins 1) (ROC1) (Cleaved into: E3 ubiquitin-protein ligase RBX1, N-terminally processed) (E3 ubiquitin-protein transferase RBX1, N-terminally processed) | 108    |
| 41  | P09601     | HMOX1 HO HO1                    | Heme oxygenase 1 (HO-1) (EC 1.14.14.18)                                                                                                                                                                                                                                                                                                          | 288    |
| 42  | Q8IWR1     | TRIM59 RNF104 TRIM57 TSBF1      | Tripartite motif-containing protein 59 (RING finger protein 104) (Tumor suppressor TSBF-1)                                                                                                                                                                                                                                                       | 403    |
| 43  | Q9H270     | VPS11 RNF108 PP3476             | Vacuolar protein sorting-associated protein 11 homolog (hVPS11) (RING finger protein 108)                                                                                                                                                                                                                                                        | 941    |
| 44  | O00469     | PLOD2                           | Procollagen-lysine,2-oxoglutarate 5-dioxygenase 2 (EC 1.14.11.4) (Lysyl hydroxylase 2) (LH2)                                                                                                                                                                                                                                                     | 737    |
| 45  | P05556     | ITGB1 FNBR MDF2 MSK12           | Integrin beta-1 (Fibronectin receptor subunit beta) (Glycoprotein Ila) (GPIIa) (VLA-4 subunit beta) (CD antigen CD29)                                                                                                                                                                                                                            | 798    |
| 46  | POC7P0     | CISD3                           | CDGSH iron-sulfur domain-containing protein 3, mitochondrial (MitoNEET-related protein 2) (Miner2) (Mitochondrial inner NEET protein) (MINT)                                                                                                                                                                                                     | 127    |
| 47  | P26358     | DNMT1 AIM CXXC9 DNMT            | DNA (cytosine-5)-methyltransferase 1 (Dnmt1) (EC 2.1.1.37) (CXXC-type zinc finger protein 9) (DNA methyltransferase Hsa1) (DNA MTase Hsa1) (M.Hsa1) (MCMT)                                                                                                                                                                                       | 1616   |
| 48  | P28300     | LOX                             | Protein-lysine 6-oxidase (EC 1.4.3.13) (Lysyl oxidase) (Cleaved into: Protein-lysine 6-oxidase, long form; Protein-lysine 6-oxidase, short form)                                                                                                                                                                                                 | 417    |
| 49  | Q96IV0     | NGLY1 PNG1                      | Peptide-N(4)-(N-acetyl-beta-glucosaminyl)asparagine amidase (PNGase) (hPNGase) (EC 3.5.1.52) (N-glycanase 1) (Peptide-N-glycanase)                                                                                                                                                                                                               | 654    |
| 50  | Q9H488     | POFUT1 FUT12 KIAA0180           | GDP-fucose protein O-fucosyltransferase 1 (EC 2.4.1.221) (Peptide-O-fucosyltransferase 1) (O-FucT-1)                                                                                                                                                                                                                                             | 388    |
| 51  | Q9H8W4     | PLEKHF2 ZFYVE18                 | Pleckstrin homology domain-containing family F member 2 (PH domain-containing family F member 2) (Endoplasmic reticulum-associated apoptosis-involved protein containing PH and FYVE domains) (EAPF) (PH and FYVE domain-containing protein 2) (Phafin-2) (Phafin2) (Zinc finger FYVE domain-containing protein 18)                              | 249    |
| 52  | Q9UHH8     | ADAMTS1 KIAA1346 METH1          | A disintegrin and metalloproteinase with thrombospondin motifs 1 (ADAM-TS 1) (ADAM-TS1) (ADAMTS-1) (EC 3.4.24.-) (METH-1)                                                                                                                                                                                                                        | 967    |
| 53  | Q13443     | ADAM9 KIAA0021 MCMP MDC9 MLTNG  | Disintegrin and metalloproteinase domain-containing protein 9 (ADAM 9) (EC 3.4.24.-) (Cellular disintegrin-related protein) (Meltrin-gamma) (Metalloprotease/disintegrin/cysteine-rich protein 9) (Myeloma cell metalloproteinase)                                                                                                               | 819    |
| 54  | Q7KZ17     | MARK2 EMK1                      | Serine/threonine-protein kinase MARK2 (EC 2.7.11.1) (EC 2.7.11.26) (ELK1 motif kinase 1) (EMK-1) (MAP/microtubule affinity-regulating kinase 2) (PAR1 homolog) (PAR1 homolog b) (Par-1b) (Par1b)                                                                                                                                                 | 788    |
| 55  | Q9H773     | DCTPP1 XTP3TPA CDA03            | dCTP pyrophosphatase 1 (EC 3.6.1.12) (Deoxycytidine-triphosphatase 1) (dCTPase 1) (RS21C6) (XTP3-transactivated gene A protein)                                                                                                                                                                                                                  | 170    |
| 56  | Q9P0L2     | MARK1 KIAA1477 MARK             | Serine/threonine-protein kinase MARK1 (EC 2.7.11.1) (EC 2.7.11.26) (MAP/microtubule affinity-regulating kinase 1) (PAR1 homolog c) (Par-1c) (Par1c)                                                                                                                                                                                              | 795    |
| 57  | Q6NXT4     | SLC30A6 ZNT6                    | Zinc transporter 6 (ZnT-6) (Solute carrier family 30 member 6)                                                                                                                                                                                                                                                                                   | 461    |
| 58  | Q7Z2K6     | ERMP1 FXNA KIAA1815             | Endoplasmic reticulum metallopeptidase 1 (EC 3.4.-.-) (Felix-ina)                                                                                                                                                                                                                                                                                | 904    |

| Zn proteins |            |                                 |                                                                                                                                                                                                                                                                                                                                                 |        |
|-------------|------------|---------------------------------|-------------------------------------------------------------------------------------------------------------------------------------------------------------------------------------------------------------------------------------------------------------------------------------------------------------------------------------------------|--------|
| A/A         | UniProt ID | Gene names                      | Protein names                                                                                                                                                                                                                                                                                                                                   | Length |
| 1           | Q9UHI8     | ADAMT51 KIAA1346 METH1          | A disintegrin and metalloproteinase with thrombospondin motifs 1 (ADAM-TS 1) (ADAM-TS1) (ADAMTS-1) (EC 3.4.24.-) (METH-1)                                                                                                                                                                                                                       | 967    |
| 2           | Q43823     | AKAP8 AKAP95                    | A-kinase anchor protein 8 (AKAP-8) (A-kinase anchor protein 95 kDa) (AKAP 95)                                                                                                                                                                                                                                                                   | 692    |
| 3           | Q9ULX6     | AKAPBL NAKAP NAKAP95 HRIHF82018 | A-kinase anchor protein 8-like (AKAP8-like protein) (Helicase A-binding protein 95) (HAP95) (Homologous to AKAP95 protein) (HA95) (Neighbor of A-kinase-anchoring protein 95) (Neighbor of AKAP95)                                                                                                                                              | 646    |
| 4           | P67870     | CSNK2B CK2N G5A                 | Casein kinase II subunit beta (CK II beta) (Phosvitin) (Protein G5a)                                                                                                                                                                                                                                                                            | 215    |
| 5           | Q14578     | CIT CRIK KIAO0949 STK21         | Citron Rho-interacting kinase (CRIK) (EC 2.7.11.1) (Serine/threonine-protein kinase 21)                                                                                                                                                                                                                                                         | 2027   |
| 6           | Q13443     | ADAM9 KIAA0021 MCMP MDC9 MLTNG  | Disintegrin and metalloproteinase domain-containing protein 9 (ADAM 9) (EC 3.4.24.-) (Cellular disintegrin-related protein) (Meltrin-gamma) (Metalloprotease/disintegrin/cysteine-rich protein 9) (Myeloma cell metalloproteinase)                                                                                                              | 819    |
| 7           | P26358     | DNMT1 AIM CXC9 DNMT             | DNA (cytosine-5)-methyltransferase 1 (Dnmt1) (EC 2.1.1.37) (CXXC-type zinc finger protein 9) (DNA methyltransferase Hsa1) (DNA MTase Hsa1) (M.Hsa1) (MCMT)                                                                                                                                                                                      | 1616   |
| 8           | P09884     | POLA1 POLA                      | DNA polymerase alpha catalytic subunit (EC 2.7.7.7) (DNA polymerase alpha catalytic subunit p180)                                                                                                                                                                                                                                               | 1462   |
| 9           | P49642     | PRIM1                           | DNA primase small subunit (EC 2.7.7.-) (DNA primase 49 kDa subunit) (p49)                                                                                                                                                                                                                                                                       | 420    |
| 10          | Q86Y76     | MIB1 DIP1 KIAA1323 ZZANK2       | E3 ubiquitin-protein ligase MIB1 (EC 2.3.2.27) (DAPK-interacting protein 1) (DIP-1) (Mind bomb homolog 1) (RING-type E3 ubiquitin transferase MIB1) (Zinc finger ZZ type with ankyrin repeat domain protein 2)                                                                                                                                  | 1006   |
| 11          | Q75592     | MYCBP2 KIAA0916 PAM             | E3 ubiquitin-protein ligase MYCBP2 (EC 2.3.2.33) (Myc-binding protein 2) (Protein associated with Myc)                                                                                                                                                                                                                                          | 4678   |
| 12          | Q9H4P4     | RNF41 FLRF NRDP1 SBB103         | E3 ubiquitin-protein ligase NRDP1 (EC 2.3.2.27) (RING finger protein 41) (RING-type E3 ubiquitin transferase NRDP1)                                                                                                                                                                                                                             | 317    |
| 13          | P62877     | RBX1 RNF75 ROC1                 | E3 ubiquitin-protein ligase RBX1 (EC 2.3.2.27) (EC 2.3.2.32) (E3 ubiquitin-protein transferase RBX1) (Protein ZYP) (RING finger protein 75) (RING-box protein 1) (Rbx1) (Regulator of cullins 1) (ROC1) (Cleaved into: E3 ubiquitin-protein ligase RBX1, N-terminally processed (E3 ubiquitin-protein transferase RBX1, N-terminally processed) | 108    |
| 14          | Q722K6     | ERMP1 FXNA KIAA1815             | Endoplasmic reticulum metalloproteinase 1 (EC 3.4.-.-) (Felix-ina)                                                                                                                                                                                                                                                                              | 904    |
| 15          | Q9BQ58     | FYCO1 ZFVVE7                    | FVVE and coiled-coil domain-containing protein 1 (Zinc finger FVVE domain-containing protein 7)                                                                                                                                                                                                                                                 | 1478   |
| 16          | Q9BQ03     | GORASP1 GOLPH5 GRASP65          | Golgi reassembly-stacking protein 1 (Golgi peripheral membrane protein p65) (Golgi phosphoprotein 5) (GOLPH5) (Golgi reassembly-stacking protein of 65 kDa) (GRASP65)                                                                                                                                                                           | 440    |
| 17          | Q96028     | NSD2 KIAA1090 MMSET TRX5 WHSC1  | Histone-lysine N-methyltransferase NSD2 (EC 2.1.1.356) (Multiple myeloma SET domain-containing protein) (MMSET) (Nuclear SET domain-containing protein 2) (Protein trithorax-5) (Wolf-Hirschhorn syndrome candidate 1 protein)                                                                                                                  | 1365   |
| 18          | P14735     | IDF                             | Insulin-degrading enzyme (EC 3.4.24.56) (Abeta-degrading protease) (Insulin protease) (Insulysin) (Insulysin)                                                                                                                                                                                                                                   | 1019   |
| 19          | P62072     | TIMM10 TIM10                    | Mitochondrial import inner membrane translocase subunit Tim10                                                                                                                                                                                                                                                                                   | 90     |
| 20          | Q9Y516     | TIMM10B FXC1 TIM9B TIMM9B       | Mitochondrial import inner membrane translocase subunit Tim10 B (Fracture callus protein 1) (FxC1) (Mitochondrial import inner membrane translocase subunit Tim9 B) (TIMM10B) (Tim10b)                                                                                                                                                          | 103    |
| 21          | Q9Y519     | TIMM8B DDP2 DDPL TIM8B          | Mitochondrial import inner membrane translocase subunit Tim8 B (DDP-like protein) (Deafness dystonia protein 2)                                                                                                                                                                                                                                 | 83     |
| 22          | Q9Y517     | TIMM9 TIM9 TIM9A TIMM9A         | Mitochondrial import inner membrane translocase subunit Tim9                                                                                                                                                                                                                                                                                    | 89     |
| 23          | O75439     | PMPCB MPPB                      | Mitochondrial-processing peptidase subunit beta (EC 3.4.24.64) (Beta-MPP) (P-52)                                                                                                                                                                                                                                                                | 489    |
| 24          | Q9XNA8     | SIRTS SIR2L5                    | NAD-dependent protein deacetylase sirtuin-5, mitochondrial (EC 2.3.1.-) (Regulatory protein SIR2 homolog 5) (SIR2-like protein 5)                                                                                                                                                                                                               | 310    |
| 25          | Q9DIV0     | NGLY1 PNG1                      | Peptide-N(4)-[N-acetyl-beta-D-glucosaminyl]asparagine amidase (PNGase) (hPNGase) (EC 3.5.1.52) (N-glycanase 1) (Peptide-N-glycanase)                                                                                                                                                                                                            | 654    |
| 26          | Q9H8W4     | PLEKHF2 ZFVVE18                 | Pleckstrin homology domain-containing family F member 2 (PH domain-containing family F member 2) (Endoplasmic reticulum-associated apoptosis-involved protein containing PH and FVVE domains) (EAPF) (PH and FVVE domain-containing protein 2) (Phafin-2) (Phafin2) (Zinc finger FVVE domain-containing protein 18)                             | 249    |
| 27          | O95391     | SLU7                            | Pre-mRNA-splicing factor SLU7 (hSlu7)                                                                                                                                                                                                                                                                                                           | 586    |
| 28          | Q5JR3X     | PITRM1 KIAA1104 MP1 PREP        | Presequence protease, mitochondrial (hPreP) (EC 3.4.24.-) (Pitriylsin metalloproteinase 1) (Metalloprotease 1) (hMP1)                                                                                                                                                                                                                           | 1037   |
| 29          | Q92900     | UPF1 KIAA0221 RENT1             | Regulator of nonsense transcripts 1 (EC 3.6.4.-) (ATP-dependent helicase RENT1) (Nonsense mRNA reducing factor 1) (NORF1) (Up-frameshift suppressor 1 homolog) (hUpf1)                                                                                                                                                                          | 1129   |
| 30          | A7MCM6     | TBKBP1 KIAA0775 SINTBAD         | TANK-binding kinase 1-binding protein 1 (TBK1-binding protein 1)                                                                                                                                                                                                                                                                                | 615    |
| 31          | Q81WR1     | TRIM59 RNF104 TRIM57 TSBF1      | Tripartite motif-containing protein 59 (RING finger protein 104) (Tumor suppressor TSBF-1)                                                                                                                                                                                                                                                      | 403    |
| 32          | Q9XNH9     | TRMT1                           | tRNA (guanine(26)-N(2))-dimethyltransferase (EC 2.1.1.216) (tRNA 2,2-dimethylguanosine-26 methyltransferase) (tRNA(m(26)G26)dimethyltransferase)                                                                                                                                                                                                | 659    |
| 33          | Q92995     | USP13 ISOT3                     | Ubiquitin carboxyl-terminal hydrolase 13 (EC 3.4.19.12) (Deubiquitinating enzyme 13) (Isopetidase T-3) (ISOT-3) (Ubiquitin thioesterase 13) (Ubiquitin-specific-processing protease 13)                                                                                                                                                         | 863    |
| 34          | Q9HF20     | VPS11 RNF108 PP3476             | Vacuolar protein sorting-associated protein 11 homolog (hVPS11) (RING finger protein 108)                                                                                                                                                                                                                                                       | 941    |
| 35          | Q86VM9     | ZC3H18 NHN1                     | Zinc finger CCH domain-containing protein 18 (Nuclear protein NHN1)                                                                                                                                                                                                                                                                             | 953    |
| 36          | Q81WR0     | ZC3H7A ZC3H7 ZC3HDC7 HSPC055    | Zinc finger CCH domain-containing protein 7A                                                                                                                                                                                                                                                                                                    | 971    |
| 37          | Q5VUA4     | ZNF318 HRIHF82436               | Zinc finger protein 318 (Endocrine regulatory protein)                                                                                                                                                                                                                                                                                          | 2279   |
| 38          | Q96F45     | ZNF503 NOLZ1                    | Zinc finger protein 503                                                                                                                                                                                                                                                                                                                         | 646    |
| 39          | Q6NXT4     | SLC30A6 ZNT6                    | Zinc transporter 6 (ZnT-6) (Solute carrier family 30 member 6)                                                                                                                                                                                                                                                                                  | 461    |
| 40          | Q8NEV0     | SLC30A7 ZNT7 ZNTL2              | Zinc transporter 7 (ZnT-7) (Solute carrier family 30 member 7) (ZnT-like transporter 2)                                                                                                                                                                                                                                                         | 376    |
| 41          | Q6PML9     | SLC30A9 C4orf1 HUJEL            | Zinc transporter 9 (ZnT-9) (Human embryonic lung protein) (HuEL) (Solute carrier family 30 member 9)                                                                                                                                                                                                                                            | 568    |

| Fe proteins |            |                  |                                                                                                                                              |        |
|-------------|------------|------------------|----------------------------------------------------------------------------------------------------------------------------------------------|--------|
| A/A         | UniProt ID | Gene names       | Protein names                                                                                                                                | Length |
| 1           | O00469     | PLOD2            | Procollagen-lysine,2-oxoglutarate 5-dioxygenase 2 (EC 1.14.11.4) (Lysyl hydroxylase 2) (LH2)                                                 | 737    |
| 2           | P09601     | HMOX1 HO HO1     | Heme oxygenase 1 (HO-1) (EC 1.14.14.18)                                                                                                      | 288    |
| 3           | P09884     | POLA1 POLA       | DNA polymerase alpha catalytic subunit (EC 2.7.7.7) (DNA polymerase alpha catalytic subunit p180)                                            | 1462   |
| 4           | Q43169     | CYB5B CYB5M OMB5 | Cytochrome b5 type B (Cytochrome b5 outer mitochondrial membrane isoform)                                                                    | 150    |
| 5           | P49643     | PRIM2 PRIM2A     | DNA primase large subunit (DNA primase 58 kDa subunit) (p58)                                                                                 | 509    |
| 6           | POC7P0     | CISD3            | CDGS8 iron-sulfur domain-containing protein 3, mitochondrial (MitoNEET-related protein 2) (Miner2) (Mitochondrial inner NEET protein) (MINT) | 127    |

| Mg proteins |            |                          |                                                                                                                                                                                                  |        |
|-------------|------------|--------------------------|--------------------------------------------------------------------------------------------------------------------------------------------------------------------------------------------------|--------|
| A/A         | UniProt ID | Gene names               | Protein names                                                                                                                                                                                    | Length |
| 1           | P61586     | RHOA ARH12 ARHA RHO12    | Transforming protein RhoA (EC 3.6.5.2) (Rho cDNA clone 12) (h12)                                                                                                                                 | 193    |
| 2           | O95573     | ACSL3 ACS3 FAFL3 LACS3   | Long-chain-fatty-acid-CoA ligase 3 (EC 6.2.1.3) (Arachidonate-CoA ligase) (EC 6.2.1.15) (Long-chain acyl-CoA synthetase 3) (LACS 3)                                                              | 720    |
| 3           | Q8TD19     | NEK9 KIAA1995 NEK8 NERCC | Serine/threonine-protein kinase Nek9 (EC 2.7.11.1) (Necrk1 kinase) (Never in mitosis A-related kinase 9) (NimA-related protein kinase 9) (NimA-related kinase 8) (Nek8)                          | 979    |
| 4           | Q7KZ17     | MARK2 EMK1               | Serine/threonine-protein kinase MARK2 (EC 2.7.11.1) (EC 2.7.11.26) (ELKL motif kinase 1) (EMK-1) (MAP/microtubule affinity-regulating kinase 2) (PAR1 homolog) (PAR1 homolog b) (Par-1b) (Par1b) | 788    |
| 5           | Q9P0L2     | MARK1 KIAA1477 MARK      | Serine/threonine-protein kinase MARK1 (EC 2.7.11.1) (EC 2.7.11.26) (MAP/microtubule affinity-regulating kinase 1) (PAR1 homolog c) (Par-1c) (Par1c)                                              | 795    |
| 6           | P05556     | ITGB1 FNBR MDF2 MSK12    | Integrin beta-1 (Fibronectin receptor subunit beta) (Glycoprotein IIa) (GPIIa) (VLA-4 subunit beta) (CD antigen CD29)                                                                            | 798    |
| 7           | Q9BU02     | THTPA                    | Thiamine-triphosphatase (ThTPase) (EC 3.6.1.28)                                                                                                                                                  | 230    |
| 8           | P21964     | COMT                     | Catechol O-methyltransferase (EC 2.1.1.6)                                                                                                                                                        | 271    |
| 9           | Q9H7F0     | ATP13A3 AFURS1           | Probable cation-transporting ATPase 13A3 (EC 7.2.2.-) (ATPase family homolog up-regulated in senescence cells 1)                                                                                 | 1226   |
| 10          | Q9H773     | DCTPP1 XTP3TPA CDA03     | dCTP pyrophosphatase 1 (EC 3.6.1.12) (Deoxycytidine-triphosphatase 1) (dCTPase 1) (RS21C6) (XTP3-transactivated gene A protein)                                                                  | 170    |

| Mn proteins |            |                       |                                                                                                      |        |
|-------------|------------|-----------------------|------------------------------------------------------------------------------------------------------|--------|
| A/A         | UniProt ID | Gene names            | Protein names                                                                                        | Length |
| 1           | Q9H488     | POFUT1 FUT12 KIAA0180 | GDP-fucose protein O-fucosyltransferase 1 (EC 2.4.1.221) (Peptide-O-fucosyltransferase 1) (O-FucT-1) | 388    |

| Cu proteins |            |            |                                                                                                                                                  |        |
|-------------|------------|------------|--------------------------------------------------------------------------------------------------------------------------------------------------|--------|
| A/A         | UniProt ID | Gene names | Protein names                                                                                                                                    | Length |
| 1           | P28300     | LOX        | Protein-lysine 6-oxidase (EC 1.4.3.13) (Lysyl oxidase) (Cleaved into: Protein-lysine 6-oxidase, long form; Protein-lysine 6-oxidase, short form) | 417    |
